# Supplementary material
Source: PubMed Central journal article supplement (PMC3009850)
Supplement: supp_M110.155242_jbc.M110.155242-1.pdf [file supp_M110.155242_jbc.M110.155242-1.pdf]

**A**

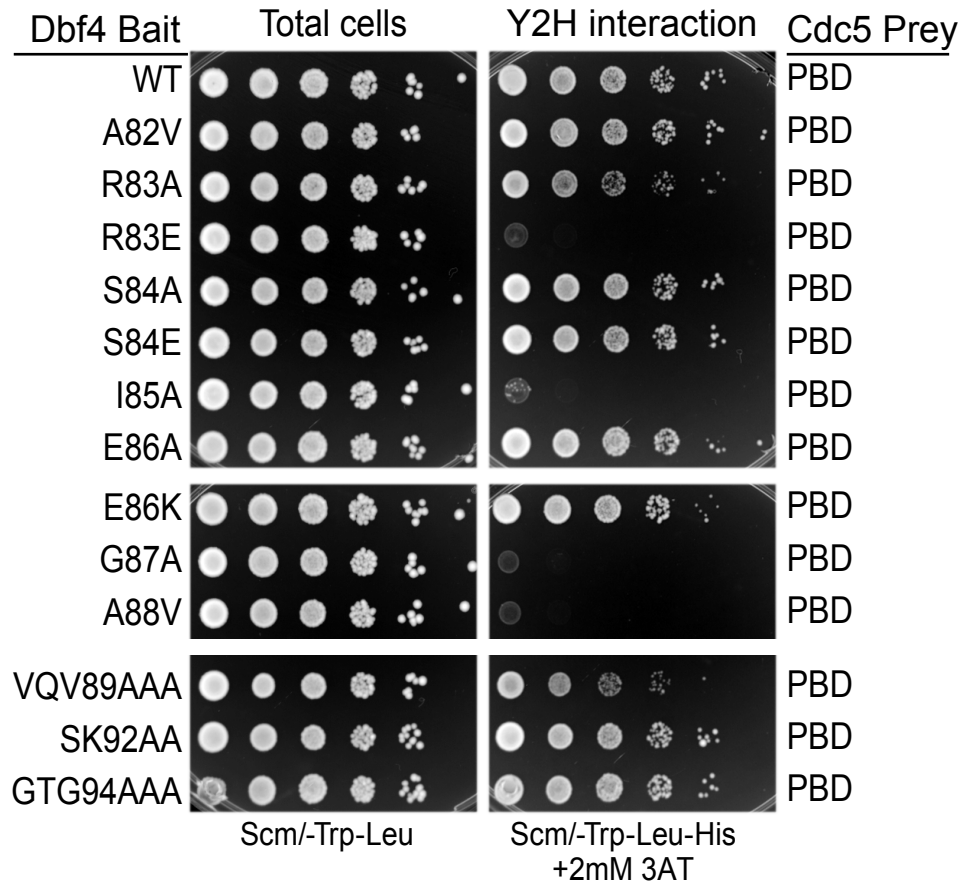

**B**

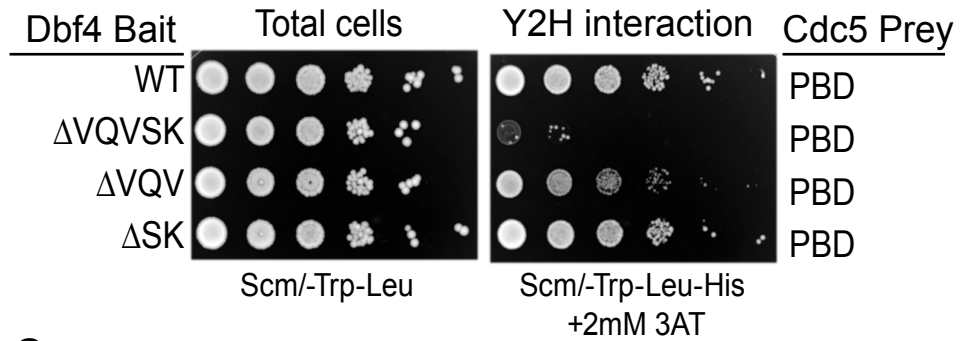

**C**

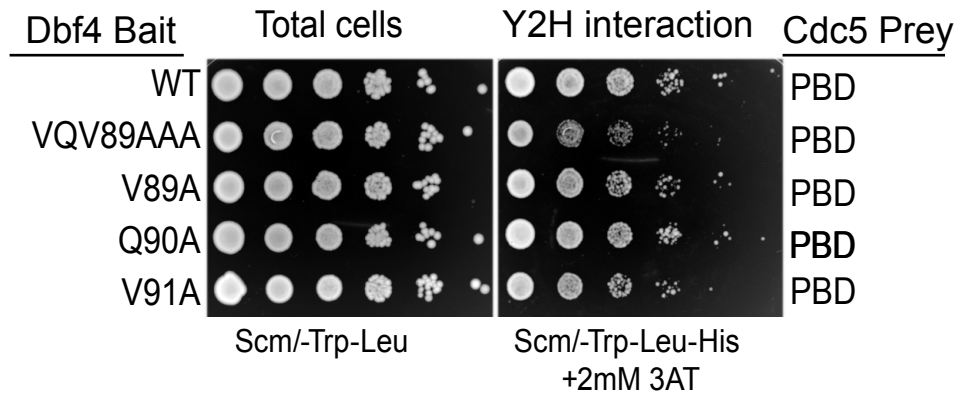

**A**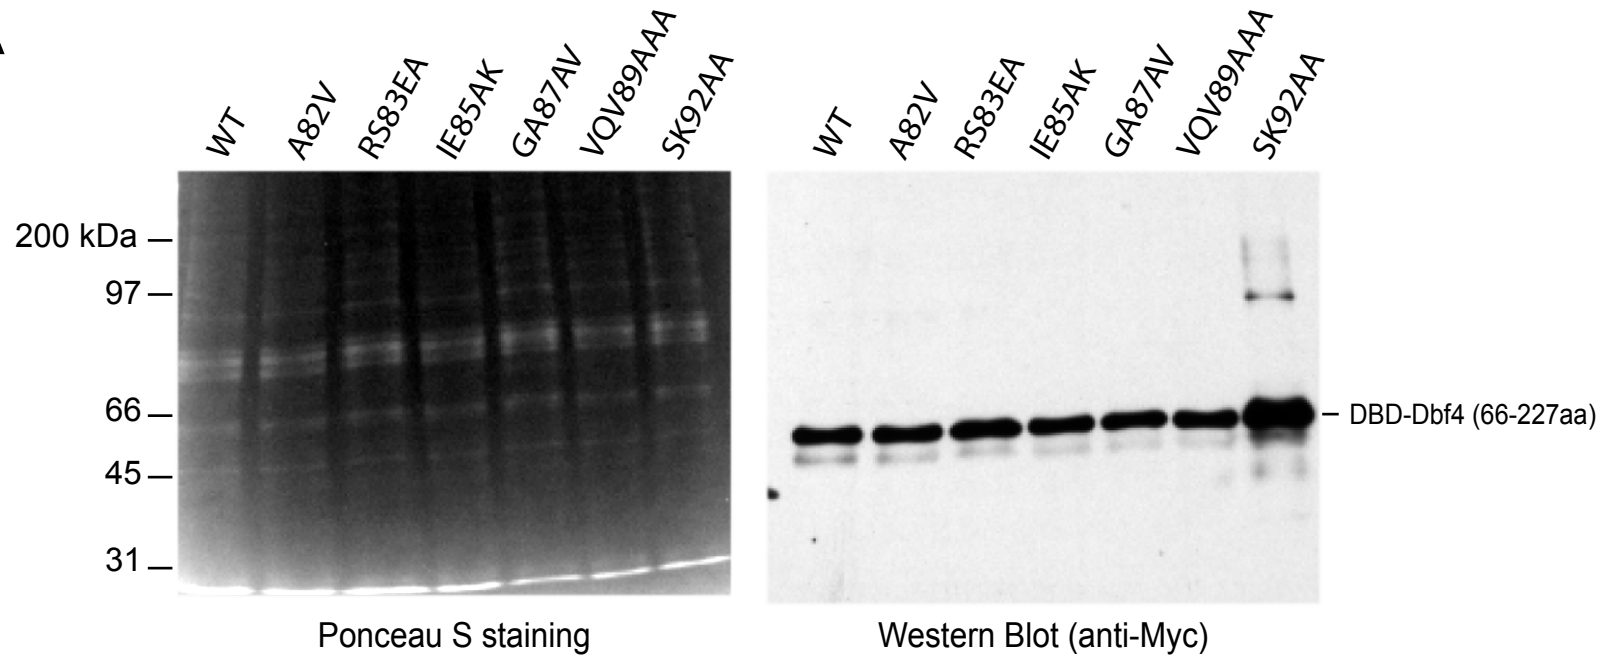**B**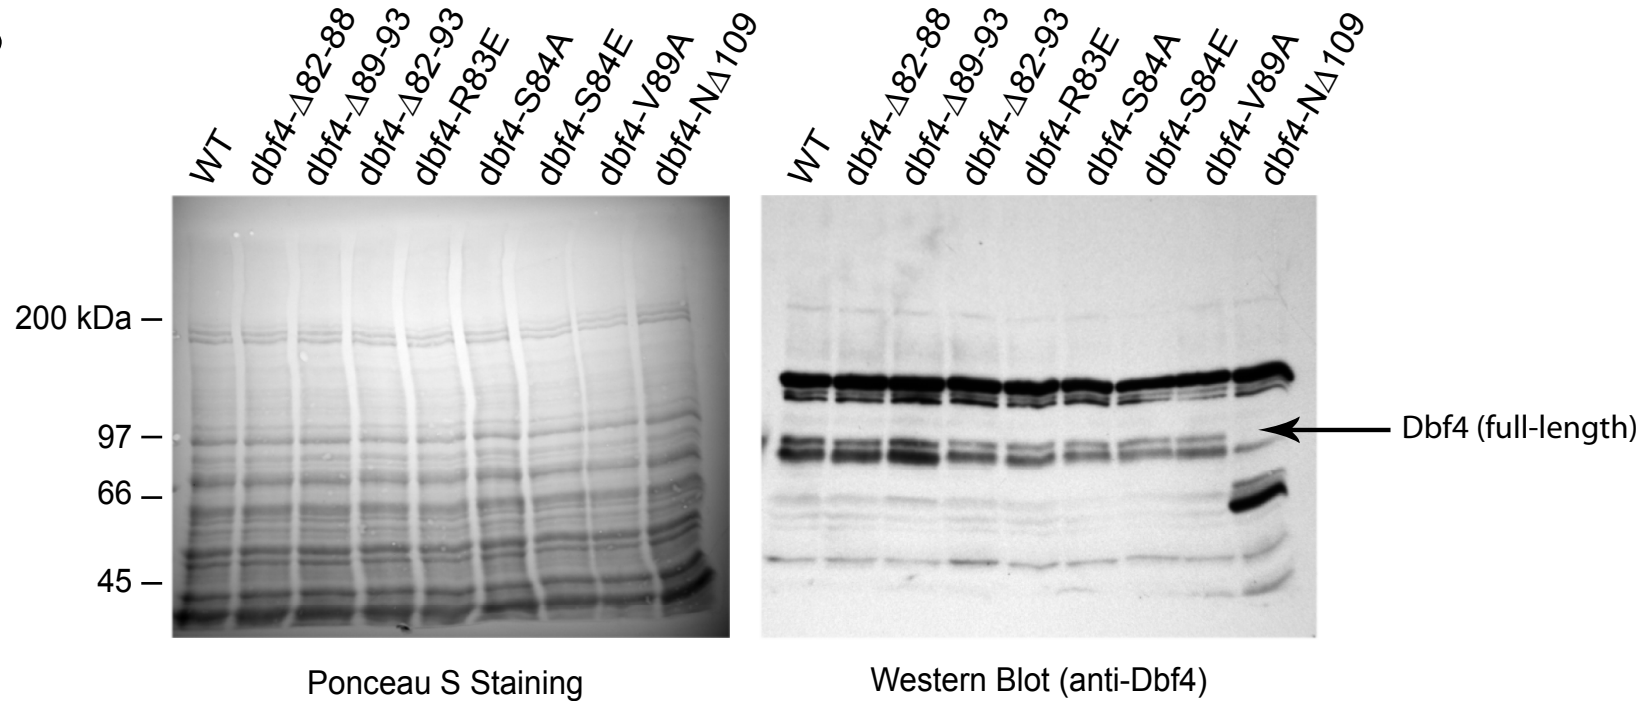

**A**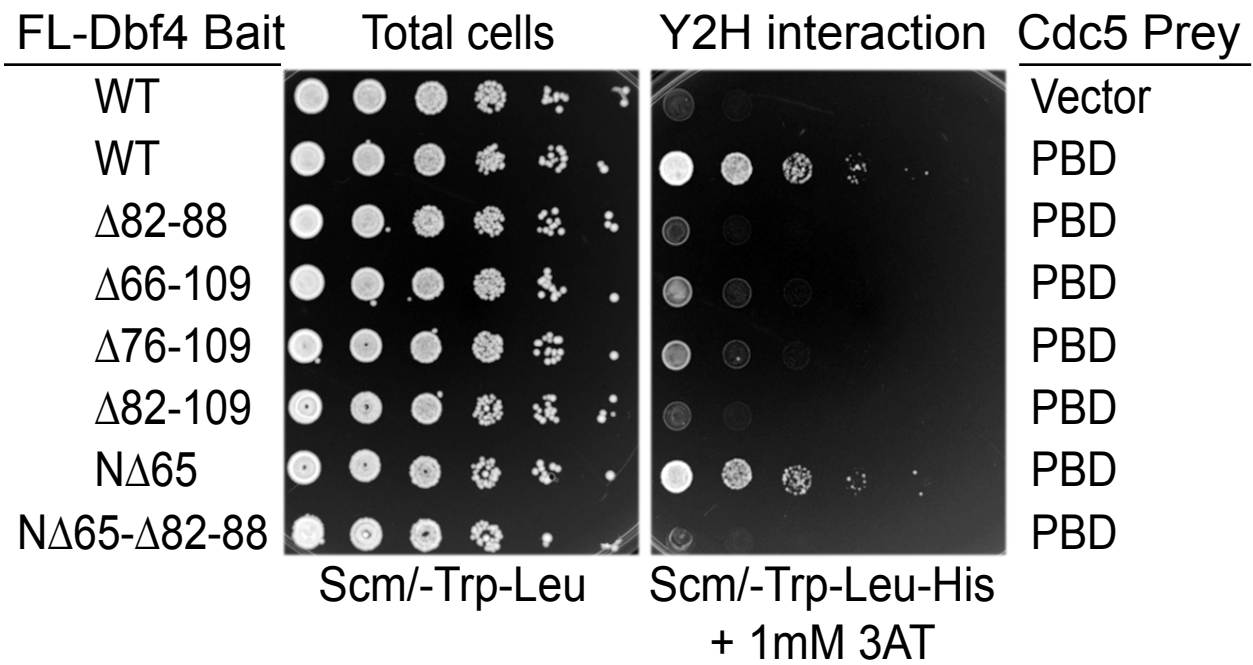**B****Full-length DBF4**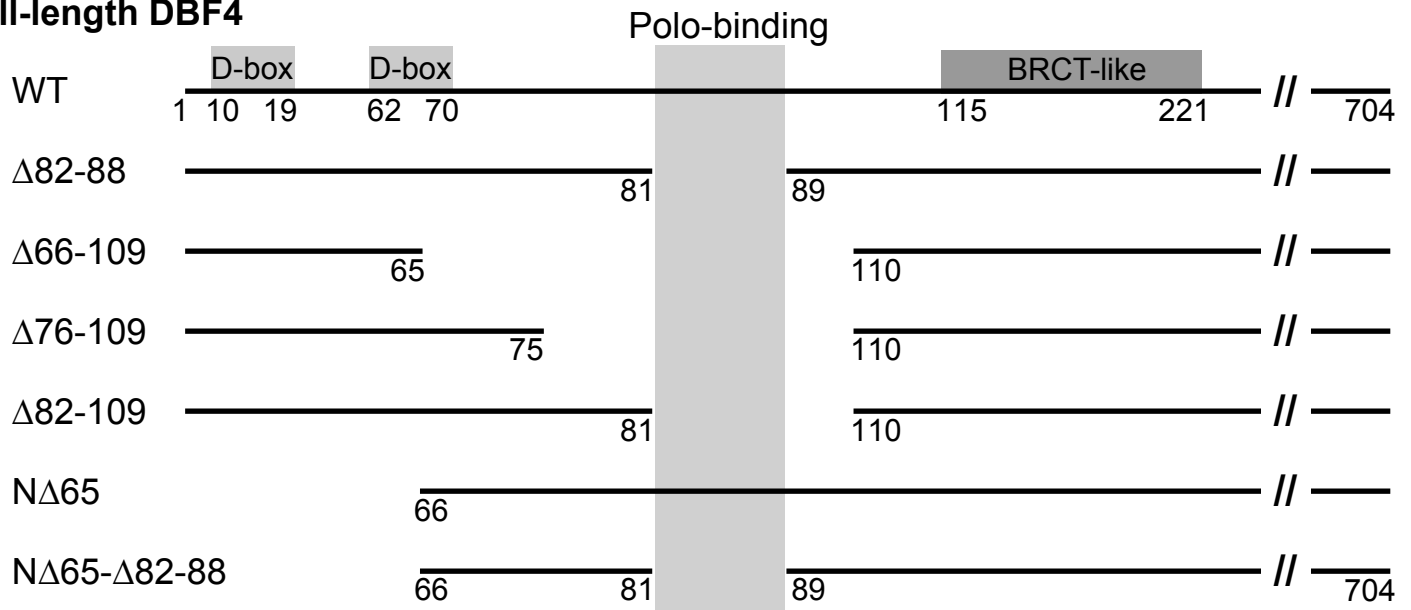

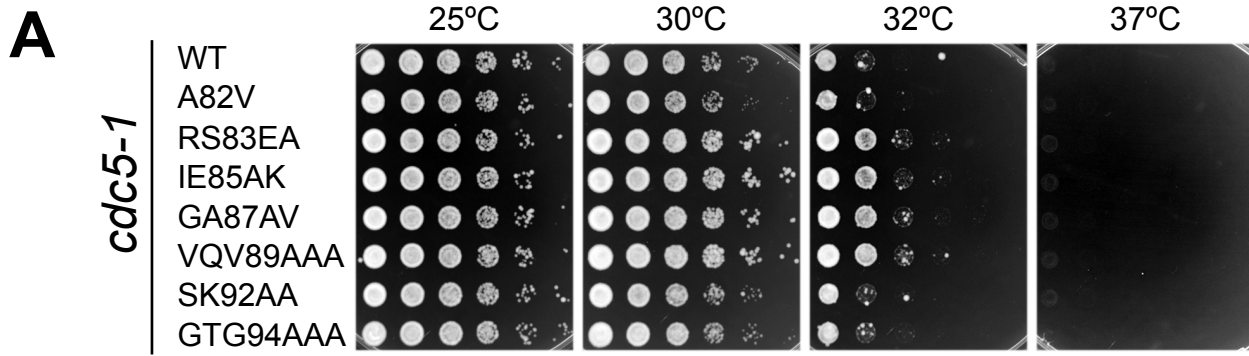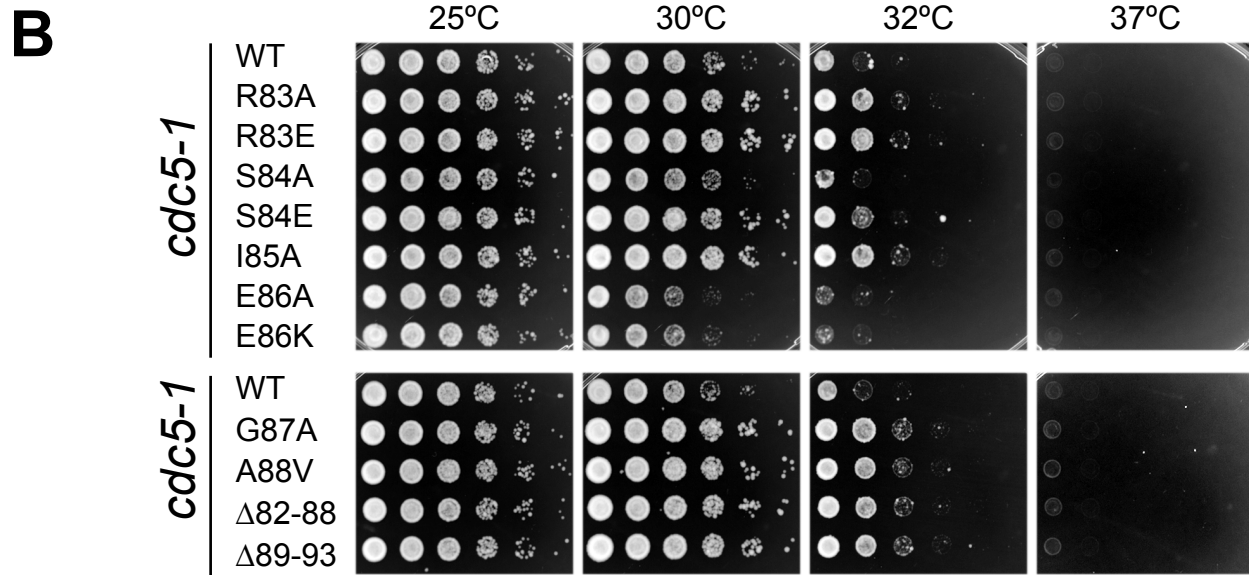

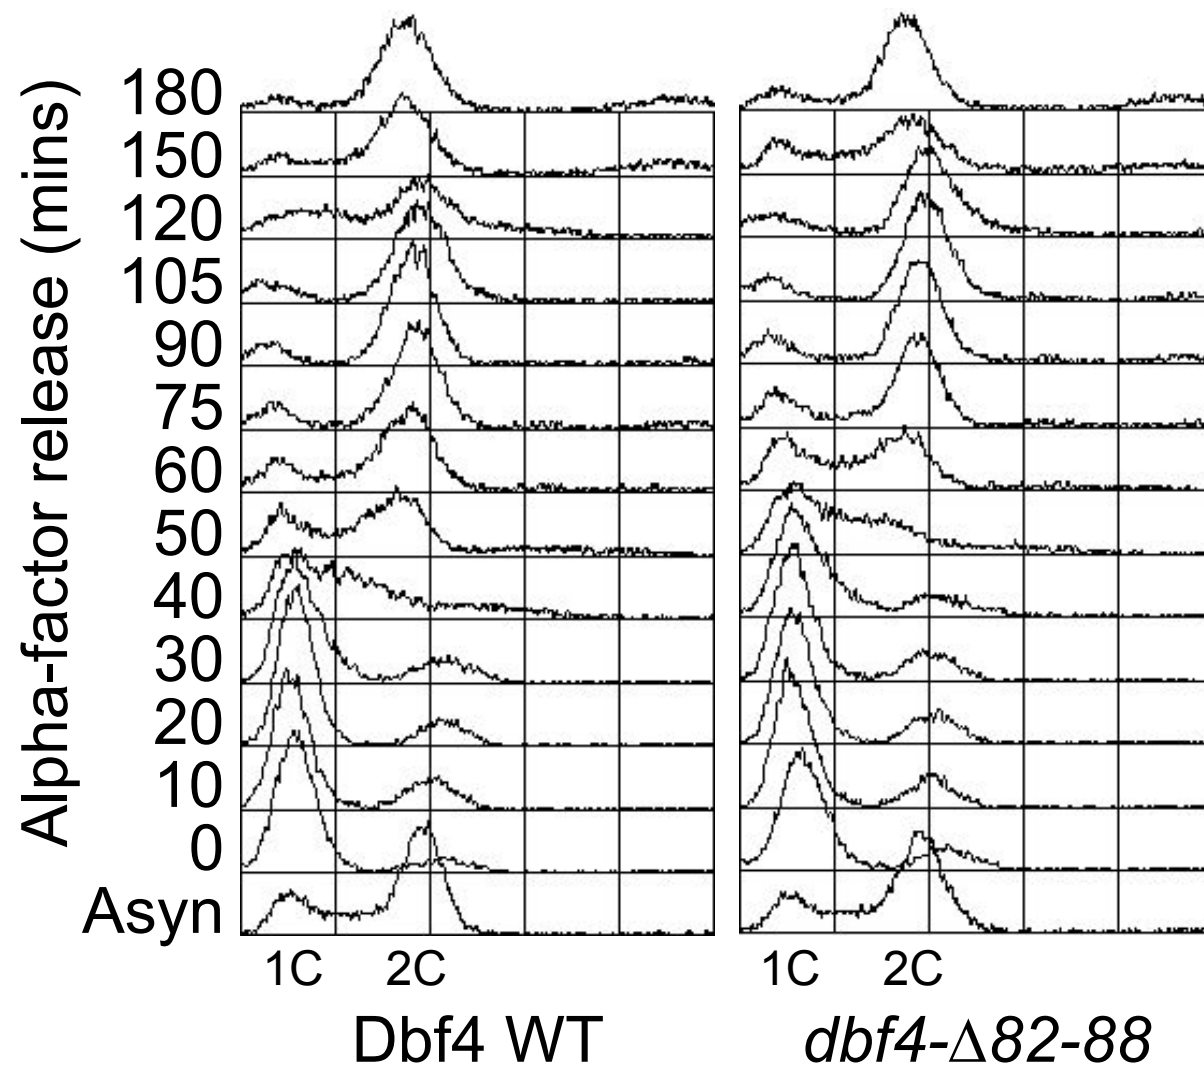



## SUPPLEMENTARY FIGURE LEGENDS

**Supplementary Figure 1. Analysis of Dbf4 residues required for interaction with the PBD.** (A) The indicated Dbf4<sub>(66-227)</sub> bait constructs were assayed for a two hybrid interaction with the Cdc5 PBD by spotting serial dilutions of cultures onto the indicated media to visualize the total number of cells (left) and the two hybrid interaction (right). (B) Although deletion of Dbf4 residues 89-93 abolishes the PBD interaction, deletion of residues 89-91 ( $\Delta$ VQV) has only a modest effect on the PBD interaction and deletion of residues 92-93 ( $\Delta$ SK) has no effect. This strongly suggests that deletion of residues 89-93 indirectly affects the Dbf4-PBD interaction. (C) The VQV89AAA triple point mutant has a similar effect on the PBD interaction as deletion of these same residues, as shown in panel B. However, the V89A, Q90A, and V91A single mutants have no effect on the PBD interaction.

**Supplementary Figure 2. Protein expression of Dbf4 constructs used in two-hybrid and *cdc5-1* suppression assays.** (A) The protein expression level of selected Gal4 DNA binding domain (DB) fusions to Dbf4<sub>(66-227)</sub> and representative point mutants spanning residues 82-93 were visualized by immunoblotting. Ponceau S staining (left) of whole cell extracts verified equal loading in each lane. Dbf4 bait constructs (DBD-Dbf4) contained a Myc tag and were detected using anti-Myc antibody (9E10). (B) Protein expression level of full length Dbf4 wild type and critical point mutants expressed in M2600 (*dbf4 $\Delta$ ::kanMX6 cdc5-1*).

**Supplementary Figure 3. Residues required for full length Dbf4 binding to the PBD.** (A) Two hybrid assays indicate that deletion of residues 82-88 within full-length Dbf4 completely disrupts the Dbf4-PBD interaction. Although deletion of N-terminal 65 residues did not affect the PBD two-hybrid interaction, the interaction was lost by the addition of the 82-88 deletion. (B) Diagram of full-length (FL) Dbf4 constructs used in two-hybrid assays. The *dbf4-N $\Delta$ 65* mutant disrupts two destruction boxes at residues 10-19 and 62-70.

**Supplementary Figure 4. Mutations of Dbf4 residues required for the PBD interaction also suppress the *cdc5-1* ts.** (A, B) A series of *dbf4* mutants were shuffled into M2600 (*dbf4 $\Delta$ ::kanMX6 cdc5-1*) on plasmids and then cured of the wild type *DBF4* plasmid. Serial dilutions of the resulting cultures were spotted at increasing temperatures to score the growth phenotype. Only those mutations that disrupt the PBD interaction suppress the *cdc5-1* temperature sensitivity. Mutations such as SK92AA or S84A that have a wild type Dbf4-PBD interaction retain the *cdc5-1* ts. The *dbf4-E86K* mutant actually causes enhanced *cdc5-1* temperature sensitivity at 30°C, consistent with the increased interaction between the Dbf4 E86K peptide and the PBD (Figure 2E).

**Supplementary Figure 5. The *dbf4- $\Delta$ 82-88* mutant exhibits normal cell cycle progression.** Wild-type W303-1A (M138) and *dbf4- $\Delta$ 82-88* (M2804) strains were arrested in G1 phase with alpha factor, and then released into cell cycle at 25°C. Samples were collected at indicated time points and analyzed by flow cytometry.

**Supplementary Figure 6. Identification of additional Cdc5 PBD mutations that disrupt the PBD-Spc72 interaction.** The Cdc5 PBD in pGAD-Cdc5.3 was randomly mutagenized using Taq polymerase. (A, B) PBDs were screened for their two-hybrid interaction with Dbf4 and Spc72 and this identified six discrete mutations that disrupt (Y618H, F526L, K643N, R620S) or impair (T515A, V537A) the interaction with Spc72 but have no effect on the PBD-Dbf4 interaction. (C) Description of mutations in Cdc5 and the corresponding amino acids in human Plk1. In the Plk1-phosphopeptide structures, L540 and R516 directly contact the phospho-threonine residue and peptide side chains, respectively (ref 24, 25) and S412 makes a water-mediated hydrogen bond with the phospho-threonine (ref 25). L423, V434, and W514 do not directly contact the peptide but are closely positioned to each other in space to make a hydrophobic region. Mutation of these residues may indirectly affect the phospho-peptide binding pocket.

Suppl Table 1 Plasmids

| Plasmid         | Description                                            | Source                              |
|-----------------|--------------------------------------------------------|-------------------------------------|
| pAcSG2          |                                                        | BD Biosciences                      |
| pCG10           | pRS415- <i>DBF4</i> <sub>110-704</sub>                 | Gabrielse et al., 2006              |
| pCG40           | pAcSG2- <i>DBF4</i> <sub>110-704</sub>                 | Miller et al., 2009                 |
| pCG53           | pGBKT7- <i>Dbf4</i> <sub>66-227</sub>                  | Miller et al., 2009                 |
| pCG60           | pCG53 <i>ADH1 promoter-Δ(-732)-(-802)</i>              | Miller et al., 2009                 |
| pCG74           | pGBKT7- <i>Dbf4</i> <sub>110-704</sub>                 | Miller et al., 2009                 |
| pCG162          | pRS416- <i>pGAL1, 10</i>                               | Miller et al., 2009                 |
| pCG166          | pCG162- <i>DBF4</i> <sub>1-225</sub>                   | Miller et al., 2009                 |
| pCG213          | pCG162- <i>DBF4</i> <sub>1-225 Δ82-88</sub>            | Miller et al., 2009                 |
| pCM1            | pGAD-C1- <i>CDC5</i> <sub>421-705</sub> H641A<br>K643M | This study                          |
| pCM16           | pAcSG2-3myc- <i>CDC5</i> <sub>65-705</sub>             | Miller et al., 2009                 |
| pET24a-<br>GST  |                                                        | Eric Xu, Van Andel<br>Institute, MI |
| pGAD-C1         |                                                        | James et al. 1996                   |
| pGAD-<br>Cdc5.3 | pGAD-C1- <i>CDC5</i> <sub>421-705</sub>                | Miller et al., 2009                 |
| pGBKT7          |                                                        | Clontech                            |
| pJK17           | pGAD-Cdc5.3 Y618H                                      | This study                          |
| pMW1            | pAcPK30- <i>DBF4</i>                                   | Gabrielse et al., 2006              |
| pMW47           | pAcSG2-HAHIS6- <i>CDC7</i>                             | Gabrielse et al., 2006              |
| pMW489          | pRS415- <i>DBF4</i> <sub>1-704</sub>                   | Gabrielse et al., 2006              |
| pMW490          | pRS416- <i>DBF4</i> <sub>1-704</sub>                   | Gabrielse et al., 2006              |
| pMW526          | pRS415- <i>DBF4</i> <sub>66-704</sub>                  | Gabrielse et al., 2006              |
| pMW535          | pRS415- <i>CDC5</i> <sub>1-705</sub>                   | This study                          |
| pMW536          | pRS416- <i>CDC5</i> <sub>1-705</sub>                   | This study                          |
| pMW541          | pMW535 H641A K643M                                     | This study                          |
| pRS415          | <i>LEU2 ARS-CEN</i>                                    | Sikorski and Hieter, 1989           |
| pRS416          | <i>URA3 ARS-CEN</i>                                    | Sikorski and Hieter, 1989           |
| pRS425          | <i>LEU2 2μm</i>                                        | Sikorski and Hieter, 1989           |
| pYJ1            | pCG60- <i>DBF4</i> <sub>72-227</sub>                   | This study                          |
| pYJ2            | pCG60- <i>DBF4</i> <sub>77-227</sub>                   | This study                          |
| pYJ3            | pCG60- <i>DBF4</i> <sub>82-227</sub>                   | This study                          |
| pYJ4            | pCG60- <i>DBF4</i> <sub>88-227</sub>                   | This study                          |
| pYJ5            | pCG60- <i>DBF4</i> <sub>94-227</sub>                   | This study                          |
| pYJ6            | pCG60- <i>DBF4</i> <sub>100-227</sub>                  | This study                          |
| pYJ7            | pCG60- <i>DBF4</i> <sub>104-227</sub>                  | This study                          |
| pYJ8            | pCG60- <i>DBF4</i> <sub>108-227</sub>                  | This study                          |
| pYJ9            | pCG60- <i>DBF4</i> <sub>110-227</sub>                  | This study                          |



|        |                                               |                     |
|--------|-----------------------------------------------|---------------------|
| pYJ10  | pCG60 R83E S84A                               | This study          |
| pYJ11  | pCG60 I85A E86K                               | This study          |
| pYJ13  | pCG60 S92A K93E                               | This study          |
| pYJ14  | pCG60 V89A Q90A V91A                          | This study          |
| pYJ15  | pCG60 S84A                                    | This study          |
| pYJ16  | pCG60 R83A S84A                               | This study          |
| pYJ17  | pCG60 I85A E86A                               | This study          |
| pYJ18  | pCG60 G87A A88V                               | This study          |
| pYJ19  | pMW489 V89A Q90A V91A                         | This study          |
| pYJ20  | pMW489 S92A K93E                              | This study          |
| pYJ21  | pMW489 I85A E86K                              | This study          |
| pYJ22  | pCG60- <i>DBF4</i> <sub>66-96</sub>           | This study          |
| pYJ26  | pCG60 A82V                                    | This study          |
| pYJ28  | pCG60 R83A                                    | This study          |
| pYJ30  | pCG60 R83E                                    | This study          |
| pYJ32  | pCG60 I85A                                    | This study          |
| pYJ33  | pCG60 E86K                                    | This study          |
| pYJ34  | pCG60 G87A                                    | This study          |
| pYJ36  | pCG60 A88V                                    | This study          |
| pYJ38  | pCG60- <i>DBF4</i> <sub>66-227 Δ82-88</sub>   | Miller et al., 2009 |
| pYJ40  | pCG60 E86A                                    | This study          |
| pYJ46  | pMW489 R83E S84A                              | This study          |
| pYJ47  | pYJ22- <i>DBF4</i> <sub>72-96</sub>           | This study          |
| pYJ49  | pYJ22- <i>DBF4</i> <sub>88-96</sub>           | This study          |
| pYJ53  | pMW489 S84A                                   | This study          |
| pYJ56  | pMW489 G87A A88V                              | This study          |
| pYJ59  | pYJ22- <i>DBF4</i> <sub>77-96</sub>           | This study          |
| pYJ61  | pYJ22- <i>DBF4</i> <sub>66-96 Δ82-88</sub>    | This study          |
| pYJ65  | pMW489 A82V                                   | This study          |
| pYJ67  | pMW489 I85A                                   | This study          |
| pYJ68  | pMW489 G87A                                   | This study          |
| pYJ74  | pMW489- <i>DBF4</i> <sub>Δ82-88</sub>         | This study          |
| pYJ79  | pMW489 A88V                                   | This study          |
| pYJ83  | pET24a-GST- <i>CDC5</i> <sub>357-705</sub>    | This study          |
| pYJ84  | pMW489 R83E                                   | This study          |
| pYJ88  | pMW489 E86K                                   | This study          |
| pYJ100 | pCG60- <i>DBF4</i> <sub>66-227 Δ82-96</sub>   | This study          |
| pYJ111 | pMW489 R83A                                   | This study          |
| pYJ114 | pMW489 E86A                                   | This study          |
| pYJ123 | pCG60 S84E                                    | This study          |
| pYJ124 | pMW489 S84E                                   | This study          |
| pYJ126 | pYJ22- <i>DBF4</i> <sub>66-96 78-81x4A</sub>  | This study          |
| pYJ128 | pCG60- <i>DBF4</i> <sub>66-227 78-81x4A</sub> | This study          |

|        |                                                   |                     |
|--------|---------------------------------------------------|---------------------|
| pYJ136 | pCG60 V89A                                        | This study          |
| pYJ137 | pCG60 Q90A                                        | This study          |
| pYJ139 | pCG60 G94A T95A G96A                              | This study          |
| pYJ141 | pMW489 V89A                                       | This study          |
| pYJ143 | pMW489 G94A T95A G96A                             | This study          |
| pYJ145 | pMW489 Q90A                                       | This study          |
| pYJ148 | pMW489 S92A                                       | This study          |
| pYJ150 | pRS425-DBF4 <sub>110-704</sub>                    | Miller et al., 2009 |
| pYJ152 | pRS425-DBF4 <sub>1-704</sub> $\Delta$ 82-88       | Miller et al., 2009 |
| pYJ153 | pRS425-DBF4 <sub>1-704</sub> G87A A88V            | This study          |
| pYJ154 | pRS425-DBF4 <sub>1-704</sub>                      | Miller et al., 2009 |
| pYJ157 | pRS425-DBF4 <sub>66-704</sub>                     | This study          |
| pYJ160 | pRS425-DBF4 <sub>1-704</sub> R83E                 | This study          |
| pYJ165 | pCG60 S92A K93A                                   | This study          |
| pYJ167 | pCG60 S92A                                        | This study          |
| pYJ169 | pCG60 K93E                                        | This study          |
| pYJ171 | pMW489 K93E                                       | This study          |
| pYJ174 | pRS425-DBF4 <sub>1-704</sub> E86K                 | This study          |
| pYJ182 | pAcSG2-DBF4 <sub>1-704</sub> $\Delta$ 82-88       | This study          |
| pYJ189 | pRS425-DBF4 <sub>66-704</sub> $\Delta$ 82-88      | This study          |
| pYJ193 | pMW489-DBF4 <sub><math>\Delta</math>76-109</sub>  | This study          |
| pYJ195 | pMW489-DBF4 <sub><math>\Delta</math>82-109</sub>  | This study          |
| pYJ198 | pMW489-DBF4 <sub><math>\Delta</math>66-109</sub>  | This study          |
| pYJ201 | pMW489-DBF4 <sub>66-704</sub> $\Delta$ 82-88      | This study          |
| pYJ204 | pGBKT7-Dbf4 <sub>1-704</sub>                      | Miller et al., 2009 |
| pYJ206 | pGBKT7-Dbf4 <sub>1-704</sub> $\Delta$ 82-88       | Miller et al., 2009 |
| pYJ210 | pGBKT7-Dbf4 <sub>1-704</sub> $\Delta$ 66-109      | This study          |
| pYJ211 | pGBKT7-Dbf4 <sub>1-704</sub> $\Delta$ 76-109      | This study          |
| pYJ212 | pGBKT7-Dbf4 <sub>1-704</sub> $\Delta$ 82-109      | This study          |
| pYJ215 | pGBKT7-Dbf4 <sub>66-704</sub> $\Delta$ 82-88      | Miller et al., 2009 |
| pYJ218 | pMW489-DBF4 <sub><math>\Delta</math>89-109</sub>  | This study          |
| pYJ221 | pMW489-DBF4 <sub><math>\Delta</math>100-109</sub> | This study          |
| pYJ222 | pMW489-DBF4 <sub><math>\Delta</math>94-109</sub>  | This study          |
| pYJ231 | pMW489 S92A K93A                                  | This study          |
| pYJ236 | pMW489-DBF4 <sub><math>\Delta</math>89-93</sub>   | This study          |
| pYJ237 | pMW489-DBF4 <sub><math>\Delta</math>89-91</sub>   | This study          |
| pYJ238 | pMW489-DBF4 <sub><math>\Delta</math>91-93</sub>   | This study          |
| pYJ260 | pRS425-DBF4 <sub>1-704</sub> S84A                 | This study          |
| pYJ263 | pRS425-DBF4 <sub>1-704</sub> S84E                 | This study          |
| pYJ272 | pRS425-DBF4 <sub>1-704</sub> V89A                 | This study          |
| pYJ274 | pRS425-DBF4 <sub>1-704</sub> Q90A                 | This study          |
| pYJ276 | pRS425-DBF4 <sub>1-704</sub> S92A                 | This study          |
| pYJ278 | pRS425-DBF4 <sub>1-704</sub> K93E                 | This study          |

|        |                                             |            |
|--------|---------------------------------------------|------------|
| pYJ292 | pCG166 R83E                                 | This study |
| pYJ294 | pCG166 S84A                                 | This study |
| pYJ296 | pCG166 S84E                                 | This study |
| pYJ297 | pCG166 E86A                                 | This study |
| pYJ298 | pCG166 E86K                                 | This study |
| pYJ302 | pCG60- <i>DBF4</i> <sub>66-227 Δ82-93</sub> | This study |
| pYJ303 | pMW489- <i>DBF4</i> <sub>Δ82-93</sub>       | This study |
| pYJ314 | pCM1 W517F                                  | This study |
| pYJ316 | pMW541 W517F                                | This study |
| pYJ326 | pCG60- <i>DBF4</i> <sub>66-227 Δ89-93</sub> | This study |
| pYJ327 | pCG60- <i>DBF4</i> <sub>66-227 Δ89-91</sub> | This study |
| pYJ328 | pCG60- <i>DBF4</i> <sub>66-227 Δ92-93</sub> | This study |
| pYJ356 | pGBKT7-Spc72 <sub>1-400</sub>               | This study |
| pYJ365 | pYJ83 H641A K643M                           | This study |
| pYJ368 | pYJ83 W517F H641A K643M                     | This study |
| pYJ415 | pCG60 V91A                                  | This study |
| pYJ439 | pGAD-Cdc5.3 F526L                           | This study |
| pYJ441 | pGAD-Cdc5.3 K643N                           | This study |
| pYJ443 | pGAD-Cdc5.3 R620S                           | This study |
| pYJ445 | pGAD-Cdc5.3 T515A                           | This study |
| pYJ447 | pGAD-Cdc5.3 V537A                           | This study |

Suppl Table 2 Yeast strains

| <b>Stain</b> | <b>Genotype</b>                                                                                           | <b>Source</b>              |
|--------------|-----------------------------------------------------------------------------------------------------------|----------------------------|
| W303-1A      | <i>MATa ade2-1, ura3-1 his3-11, -15 trp1-1 leu2-3, -112 can1-100</i>                                      | Thomas and Rothstein, 1989 |
| PJ69-4A      | <i>MATa trp1-901 leu2-3, -112 ura3-52 his3-200 gal4Δ gal80Δ LYS2::GAL1-HIS3 GAL2-ADE2 met2::GAL7-lacZ</i> | James et al., 1996         |
| M319         | W303 <i>MATa dbf2-1</i>                                                                                   | Miller et al., 2009        |
| M331         | W303 <i>MATa cdc15-2</i>                                                                                  | Miller et al., 2009        |
| M895         | W303 <i>MATa dbf4Δ::kanMX6</i> [pMW490; pRS416- <i>DBF4 URA3</i> ]                                        | Cabrielse et al., 2006     |
| M1614        | W303 <i>MATa cdc5-1</i>                                                                                   | Miller et al., 2009        |
| M1649        | W303 <i>MATa cdc14-1</i>                                                                                  | Miller et al., 2009        |
| M1656        | W303 <i>MATa dbf4-NΔ109-kanMX6</i>                                                                        | Miller et al., 2009        |
| M1678        | W303 <i>MATa cdc5-2(msd2-1)-URA3</i>                                                                      | This study                 |
| M1680        | W303 <i>MATa cdc5-5(msd2-4)-URA3</i>                                                                      | This study                 |
| M1672        | W303 <i>MATa cdc5Δ::kanMX6</i> [pMW536; pRS416- <i>CDC5 URA3</i> ]                                        | This study                 |
| M1800        | W303 <i>MATα dbf4-NΔ109-kanMX6</i>                                                                        | Miller et al., 2009        |
| M1999        | W303 <i>MATa cdc15-4</i>                                                                                  | This study                 |
| M2600        | W303 <i>MATa cdc5-1 dbf4Δ::kanMX6</i> [pMW490; pRS416- <i>DBF4 URA3</i> ]                                 | This study                 |
| M2655        | W303 <i>MATa cdc5-1 dbf4-NΔ109-kanMX6</i>                                                                 | Miller et al., 2009        |
| M2657        | W303 <i>MATα cdc5-1 dbf4-NΔ109-kanMX6</i>                                                                 | Miller et al., 2009        |
| M2804        | W303 <i>MATa dbf4-Δ82-88-kanMX6</i>                                                                       | Miller et al., 2009        |
| M2805        | W303 <i>MATα dbf4-Δ82-88-kanMX6</i>                                                                       | This study                 |
| M2806        | W303 <i>MATa dbf4-R83E-kanMX6</i>                                                                         | This study                 |

|       |                                                                                                                          |                       |
|-------|--------------------------------------------------------------------------------------------------------------------------|-----------------------|
| M2807 | W303 <i>MAT<math>\alpha</math> dbf4-R83E-kanMX6</i>                                                                      | This study            |
| M3112 | W303 <i>MAT<math>\alpha</math> cdc5-1 dbf4-<math>\Delta</math>82-88-kanMX6</i>                                           | Miller et al., 2009   |
| M3114 | W303 <i>MAT<math>\alpha</math> cdc5-1 dbf4-<math>\Delta</math>82-88-kanMX6</i>                                           | This study            |
| M3116 | W303 <i>MAT<math>\alpha</math> cdc5-1 dbf4-R83E-kanMX6</i>                                                               | This study            |
| M3117 | W303 <i>MAT<math>\alpha</math> cdc5-1 dbf4-R83E-kanMX6</i>                                                               | This study            |
| M3376 | W303 <i>MAT<math>\alpha</math> cdc5<math>\Delta</math>::kanMX6</i> [pMW535; pRS415- <i>CDC5 LEU2</i> ]                   | This study            |
| M3377 | W303 <i>MAT<math>\alpha</math> cdc5<math>\Delta</math>::kanMX6</i> [pMW541; pRS415- <i>cdc5-H641A-K643M LEU2</i> ]       | This study            |
| M3378 | W303 <i>MAT<math>\alpha</math> cdc5<math>\Delta</math>::kanMX6</i> [pYJ314; pRS415- <i>cdc5-W517F-H641A-K643M LEU2</i> ] | This study            |
| M3486 | W303 <i>MAT<math>\alpha</math> cdc5-H641A-K643M</i>                                                                      | This study            |
| M3490 | W303 <i>MAT<math>\alpha</math> TAB6-1</i>                                                                                | D'Aquino et al., 2005 |
| M3502 | W303 <i>MAT<math>\alpha</math> cdc5-H641A-K643M-kanMX6</i>                                                               | This study            |
| M3526 | W303 <i>MAT<math>\alpha</math> TAB6-1-TRP1</i>                                                                           | This study            |

Suppl Table 3 Peptides

| <b>Peptide name</b> | <b>Abbr.</b> | <b>Peptide sequence</b>                | <b>Length</b> | <b>MW</b> |
|---------------------|--------------|----------------------------------------|---------------|-----------|
| Biotin-Dbf4 73-96   | Biotin-p     | Biotin-EKK RAR IER ARS IEG AVQ VSK GTG | Biotin + 24   | 2854      |
| Dbf4 73-96          | p1           | EKK RAR IER ARS IEG AVQ VSK GTG        | 24            | 2627.9    |
| Dbf4 78-96          | p2           | RIE RAR SIE GAV QVS KGT G              | 19            | 2015.3    |
| Dbf4 78-93          | p3           | RIE RAR SIE GAV QVS K                  | 16            | 1799.2    |
| Dbf4 80-93          | p4           | ERA RSI EGA VQV SK                     | 14            | 1530      |
| Dbf4-R83E           | R83E         | ERA ESI EGA VQV SK                     | 14            | 1503.1    |
| Dbf4-S84A           | S84A         | ERA RAI EGA VQV SK                     | 14            | 1514.1    |
| Dbf4-pS84           | pS84         | ERA R(pS)I EGA VQV SK                  | 14            | 1610.1    |
| Dbf4-I85A           | I85A         | ERA RSA EGA VQV SK                     | 14            | 1487.7    |
| Dbf4-E86K           | E86K         | ERA RSI KGA VQV SK                     | 14            | 1529.2    |
| Dbf4-GA87AV         | GA87AV       | ERA RSI EAV VQV SK                     | 14            | 1572.2    |
| Biotin-Spc72        | Biotin-Spc72 | Biotin-EEF LSL AQS (pS)PA GSQ LES RD   | Biotin + 20   | 2457.6    |
| Spc72               | Spc72        | EEF LSL AQS (pS)PA GSQ LES RD          | 20            | 2231.3    |
